# Supplementary material for: Gut Microbiota Mediates the Protective Effects of Dietary Capsaicin against Chronic Low-Grade Inflammation and Associated Obesity Induced by High-Fat Diet
Source: PubMed Central journal article supplement (PMC5442453; doi:10.1128/mbio.00470-17), 2017-05-23
Supplement: mbo003173307sf3.pdf [file mbo003173307sf3.pdf]

**A**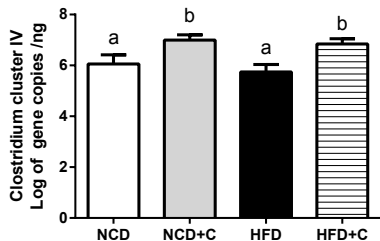**B**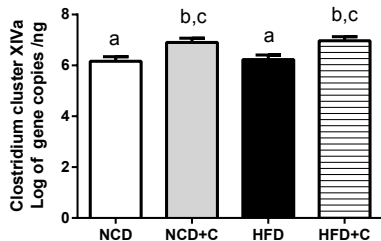**C**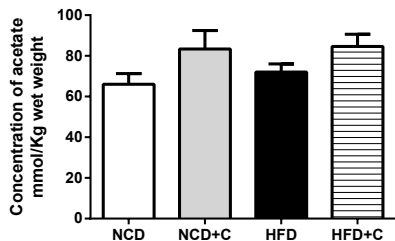**D**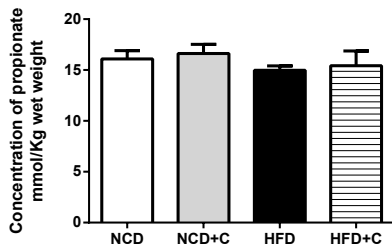

FIG S3. CAP alters the abundance of cecal butyrate-producing bacteria and fecal SCFA concentrations. qPCR analysis showing the abundance (gene copies) of *Clostridium cluster IV* (A) and *Clostridium cluster XIVa* (B). Fecal concentration of acetate (C) and propionate (D). Data are expressed as mean  $\pm$  SEM. Data with different superscript letters are significantly different ( $P < 0.05$ ) using one-way ANOVA with a *post hoc* Bonferroni's multiple comparison test.
