# Supplementary material for: Gut Microbiota Mediates the Protective Effects of Dietary Capsaicin against Chronic Low-Grade Inflammation and Associated Obesity Induced by High-Fat Diet
Source: PubMed Central journal article supplement (PMC5442453; doi:10.1128/mbio.00470-17), 2017-05-23
Supplement: mbo003173307sf4.pdf [file mbo003173307sf4.pdf]

**A**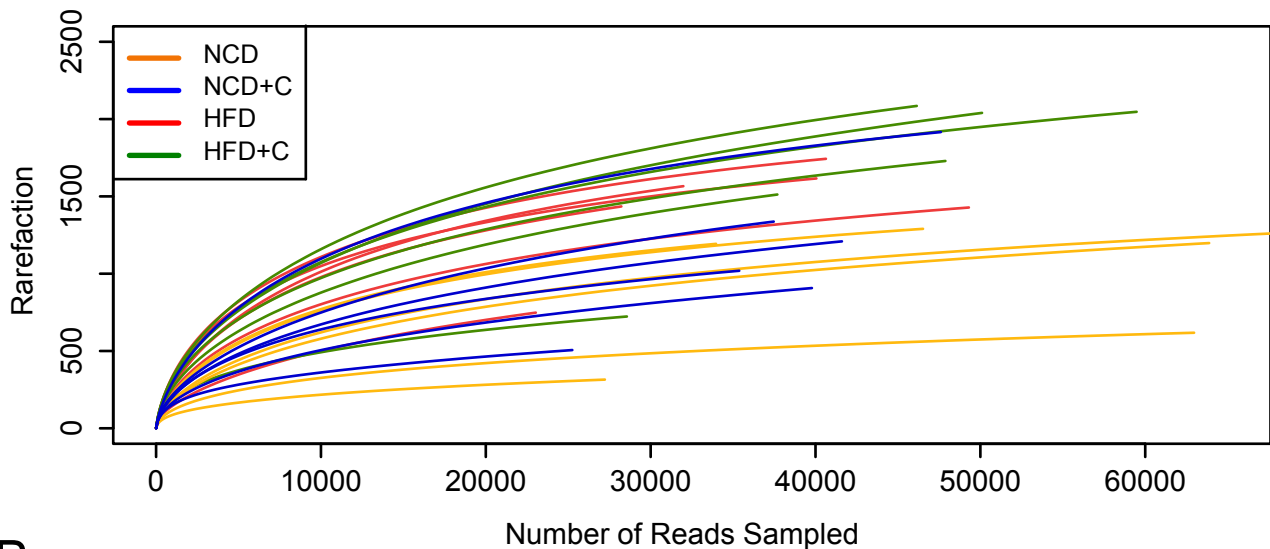**B**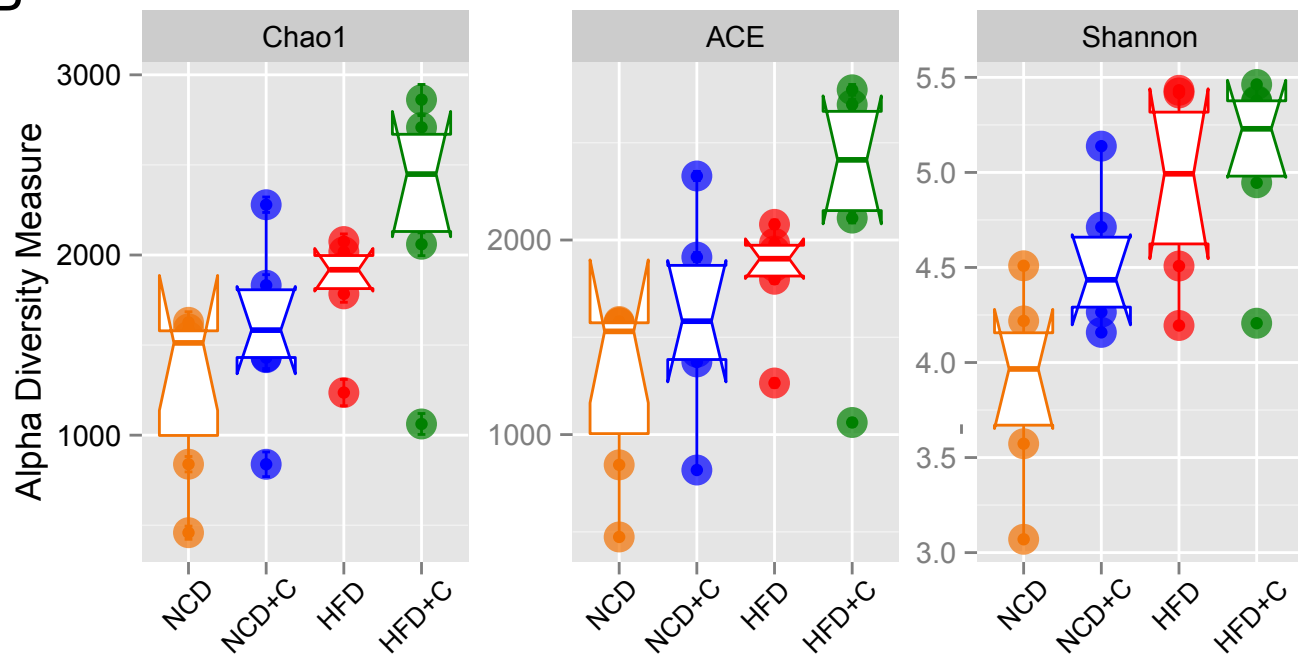

FIG S4. CAP beneficially alters gut microbiota. Rarefaction curves of sequencing samples (A) and  $\alpha$ -diversity (B) of gut microbial communities assessed by Chao1, ACE and Shannon  $\alpha$ -diversity index, respectively (data are presented as median with inter-quartile range).
