# Supplementary material for: Gut Microbiota Mediates the Protective Effects of Dietary Capsaicin against Chronic Low-Grade Inflammation and Associated Obesity Induced by High-Fat Diet
Source: PubMed Central journal article supplement (PMC5442453; doi:10.1128/mbio.00470-17), 2017-05-23
Supplement: mbo003173307sf5.pdf [file mbo003173307sf5.pdf]

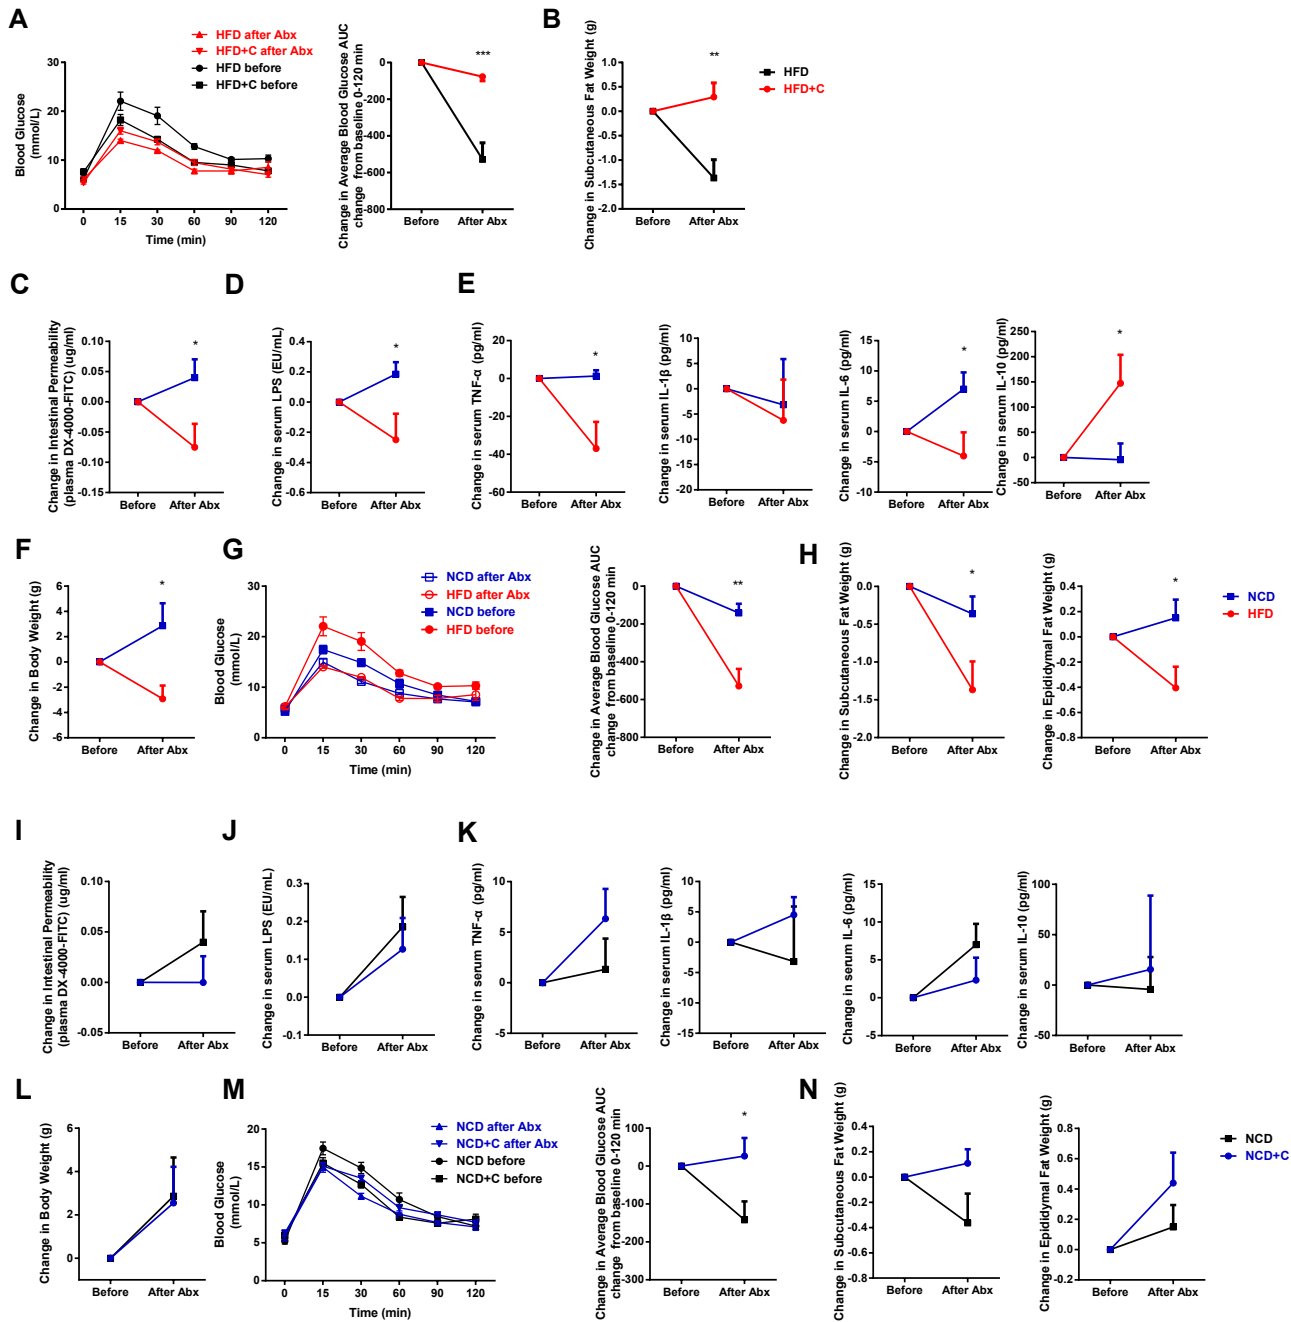

FIG S5. Gut microbiota mediates the beneficial effects of CAP on chronic inflammation and obesity. WT mice ( $n = 6/\text{group}$ ) received HFD  $\pm$  CAP and NCD  $\pm$  CAP for 12 weeks and then treated with antibiotic (abx) cocktail for 6 weeks. Data were analyzed before and after Abx supplementation. 1) HFD vs. HFD+C; Markers of obesity and insulin resistance (A-B). 2) NCD vs. HFD; metabolic endotoxemia (ME) (C-D), chronic low grade inflammation (CLGI) (E) and obesity/insulin resistance (F-H). 3) NCD vs. NCD+C; ME (I-J), CLGI (K) and obesity/insulin resistance (L-N). Data are expressed as mean  $\pm$  SE; Unpaired two-tailed student T-test. \* $P < 0.05$ ; \*\* $P < 0.01$ ; \*\*\* $P < 0.001$ .
